# Supplementary material for: Uncovering the potential functions of lymph node metastasis-associated aberrant methylation differentially expressed genes and their association with the immune infiltration and prognosis in bladder urothelial carcinoma
Source: PeerJ. 2023 Apr 24;11:e15284. doi: 10.7717/peerj.15284 (PMC10135411; doi:10.7717/peerj.15284)
Supplement: Supplemental Information 1 [file peerj-11-15284-s001.xlsx]

## Sheet: Sheet1
Figure 7
Number	1	2	3	4	5	6	7	8	9	10	11	12	13	14	15	16	17	18
Paracancerous tissue	0.959264	1.05702	0.959264	1.20581	1.06069	1.10191	0.962594	0.976032	0.671286	1.01748	1.02456	0.835088	1.34257	0.886791	1.14076	1.0693	0.949342	0.97942
	1.04247	0.946058	1.04247	0.82932	0.942785	0.907519	1.03886	1.02456	1.48968	0.982821	0.976032	1.19748	0.744839	0.833161	0.876606	1.06191	1.05336	1.02101
																0.880666
Cancer tissue	0.229251	0.00687226	0.0631532	0.0156792	0.000521516	0.00497875	0.0297356	0.408951	0.0177013	2.06337	0.4954	0.0024213	0.00526871	0.379806	0.00938778	0.00649405	0.139661	0.00442533
	0.216885	0.00741674	0.0622838	0.0131846	0.000683392	0.00647906	0.183434	0.476319	0.0187106	2.61172	0.48858	0.00335377	0.00443044	0.464366	0.00706546	0.0074597	0.146604	0.00454974
															0.00682479	0.0135396	0.106579
	negative	weakly positive	positive	strongly postive
Normal	0	0.032258	0.096774	0.870968
Cancer	0.483871	0.290323	0.225806	0
	strongly positive	positive	weakly positive	negtive
T1-2	0.307692	0.307692	0.333333	0.051282
T3-4	0	0.035714	0.464286	0.5
	strongly positive	positive	weakly positive	negative
low grade	0.363636	0.333333	0.227273	0.075758
high grade	0.02381	0.071429	0.571429	0.333333
	strongly positive	positive	weakly positive	negative
no metastasis	0.42381	0.407143	0.128571	0.040476
lymphatic metastasis	0.033333	0.133333	0.533333	0.3
Figure 8
	Sv-huc-1	T24	5637	Biu87	EJ
	0.909093	0.157127	0.057711	0.083187	0.076151
	0.994815	0.129408	0.102593	0.031304	0.055746
	1.08862	0.036147	0.092462	0.069468	0.039146
	1.01572	0.097396	0.040808	0.009372	0.03029
	EJ-control	EJ-OE-AKAP7
	0.852635	9.18959
	1.17284	6.96441
		8.51496
	T24-Control	T24-sh1-AKAP7	T24-sh2-AKAP7
	1.05215	0.080586	0.058924
	1.27162	0.13742	0.041955
	1.18646	0.150378
Figure 9
migration	EJ-control	EJ-OE-AKAP7
	765	149
	699	215
	679	195
invasion	EJ-control	EJ-OE-AKAP7
	307	101
	299	111
	345	107
migration	T24-Control	T24-sh1-AKAP7	T24-sh2-AKAP7
	71	367	301
	89	324	295
	94	319	276
invasion	T24-Control	T24-sh1-AKAP7	T24-sh2-AKAP7
	89	521	499
	97	512	579
	102	574	569
